1  
2  
3  
4  
5  
6  
7  
8  
9  
10  
11  
12  
13  
14  
15  
16  
17  
18  
19  
20  
21  
22  
23

Normative Data for an Expanded Set of Stimuli for  
Testing High-Level Influences on Object Perception: OMEFA-II

Colin S. Flowers<sup>1</sup>, Kimberley D. Orsten-Hooge<sup>2</sup>, Barnes G.L. Jannuzi<sup>3#</sup>, Mary A. Peterson<sup>1, 4</sup>

<sup>1</sup>Department of Psychology, University of Arizona, Tucson, Arizona, United States of America

<sup>2</sup> School of Behavioral and Brain Sciences, The University of Texas at Dallas, Dallas, Texas,  
United States of America

<sup>3</sup> Neuroscience and Cognitive Science Program, University of Arizona, Tucson, Arizona, United  
States of America

<sup>4</sup>Cognitive Science Program, University of Arizona, Tucson, Arizona, United States of America

<sup>#</sup>Current Address: Neuroscience Graduate Group, University of Pennsylvania, Philadelphia,  
Pennsylvania, United States of America

Corresponding Author:

Email: [cflowers@email.arizona.edu](mailto:cflowers@email.arizona.edu) (CSF)

24 Abstract

25 We present normative data for *bipartite displays* used to investigate high-level contributions to  
26 object perception in general and to figure-ground perception in particular. In these vertically-  
27 elongated displays, two equal-area regions of different luminance abut a central, articulated,  
28 vertical border. In *Intact* displays, a portion of a mono-oriented well-known (“familiar”) object is  
29 sketched along one side of the border; henceforth the “*critical side*.” The other side is the  
30 “*complementary side*.” We measured inter-subject agreement among 32 participants regarding  
31 objects depicted on the critical and complementary sides of the borders of *Intact* displays and  
32 two other types of displays: upright and inverted *Part-Rearranged* displays. The parts on the  
33 critical side of the border are the same in upright *Intact* and *Part-Rearranged* displays but  
34 spatially rearranged into a new configuration in the latter. Inter-subject agreement is taken to  
35 index the extent to which a side activates traces of previously seen objects near the central  
36 border. We report normative data for 288 regions near the central borders of 144 displays  
37 (48/type) and a thorough description of the image features. This set of stimuli is larger than an  
38 older “Object Memory Effects on Figure Assignment” (OMEFA) set. This new OMEFA-II set of  
39 high-resolution displays is available online (<https://osf.io/j9kz2/>).

40           A fundamental aspect of object perception involves determining whether a border  
41 between two regions in the visual field is a bounding contour of an object on one side, whether  
42 the border is *assigned to* one side, or *owned by* one side but not the other. When the border  
43 assignment occurs, the region on the side to which the border is assigned is perceived as a *figure*  
44 (i.e., an object) shaped by the border, whereas the other side is perceived as a locally shapeless  
45 *ground* (i.e., a background; e.g., [1 – 4]). Border assignment is influenced by figural priors –  
46 object properties associated with figures rather than backgrounds, including enclosure,  
47 symmetry, surroundedness, size, convexity, top-bottom polarity, lower region, contrast, and  
48 familiar configuration (e.g., [4 – 10]; for reviews: [1, 3, 11]).

49           The aforementioned figural priors are image characteristics. Another figural prior –  
50 *familiar configuration* – depends upon past experience rather than image characteristics (e.g., [2,  
51 12, 13]; for review: [14, 15]). Effects of familiar configuration on figure assignment were  
52 demonstrated using vertically elongated *bipartite* displays like those in Figure 1, each consisting  
53 of two equal-area regions (one black, one white) meeting at a central, articulated, vertical border.  
54 The displays were designed so that the central border sketched a portion of a common mono-  
55 oriented object (that has a typical upright orientation) on one, “critical,” side and not on the  
56 opposite, “complementary,” side (see Figure 1A). This nominal difference between the two sides  
57 of the displays was affirmed in pilot experiments that revealed high inter-subject agreement  
58 regarding the common object resembled by the critical side of the border and low inter-subject  
59 agreement regarding any common object depicted on the complementary side of the border (cf.,  
60 [12, 13, 16]).

61 Figure 1. A sample bipartite stimulus in 4 configurations. In this figure, the critical side of the border is presented in  
62 black on the left of the central border. In the experiments the black/white contrast and left/right location of the  
63 critical side was balanced. A) Intact, B) Inverted, C) Upright Part-rearranged, D) Inverted Part-rearranged versions  
64 of the source stimulus, “Pineapple.” In experiments, the bipartite stimuli are presented on a medium gray backdrop  
65 so that the black and white sides contrast equally with the backdrop.

66 Peterson et al. [2, 12, 13, 16, 17] demonstrated effects of past experience by showing that  
67 the figure was more likely to be perceived on the critical side of the border in upright versus  
68 inverted versions of these displays (see Figures 1A & B). Image characteristics are held constant  
69 over a 180° orientation change but past experience is not because familiarity with mono-oriented  
70 objects is established by repeated exposure to them in their typical upright orientation; hence,  
71 inverted versions of mono-oriented objects are less familiar than upright versions. Peterson et al.  
72 [2, 16] demonstrated that these effects were due to the familiarity of configurations rather than of  
73 parts in experiments that showed that the figure was substantially more likely to be perceived on  
74 the critical side of the central border when the familiar configuration was sketched there in an  
75 intact form (i.e., its parts were arranged properly from top-to bottom; Figure 1A) than when its  
76 parts were spatially rearranged into a new, *Part-Rearranged*, configuration (Figure 1C). They  
77 reasoned that these effects manifested influences of object memories on figure assignment.

78 Previous experiments investigating effects of familiar configuration on figure assignment  
79 used  $\leq 24$  bipartite displays depicting a portion of an *Intact* familiar configuration on one side of  
80 the border with associated *Inverted Intact* and *Upright Part-Rearranged* versions. A set of  
81 stimuli originally used in experiments with brain-damaged participants, the “Object Memory  
82 Effects on Figure Assignment” (OMEFA) set has been used extensively [18 – 20]. Barense et al.  
83 [18, 21, 22] tested figure assignment with *Inverted Part-Rearranged* displays as well. Recently,  
84 we modified the borders of the OMEFA stimuli, producing high-resolution images; we also  
85 eliminated some items and added others. In this article, we report contemporary data on inter-  
86 subject agreement regarding the common objects resembled by the critical and the  
87 complementary sides of 144 bipartite displays in an expanded, fine-tuned, set of *Upright Intact*

88 (N = 48), *Upright Part-Rearranged* (N = 48), and *Inverted Part-Rearranged* (N = 48 each)  
89 stimuli – the OMEFA-II stimulus set.

90 We used the Amazon Mechanical Turk (AMT) platform to gather contemporary norms  
91 regarding the familiar objects resembled by both sides of the border in the three types of  
92 displays. In what follows, we denote the stimuli by the name of the familiar configuration  
93 intended to be depicted by the *Upright Intact* displays (the “source” name) modified by display  
94 type. Individual participants viewed and responded to stimuli of all display types but, they saw a  
95 stimulus derived from a particular source stimulus in only one of the three display types. They  
96 viewed each stimulus for as long as they wished and listed up to three interpretations for each  
97 side of each bipartite display. *Inverted Intact* displays were not tested because when viewed for  
98 long periods of time, the inverted source object is easily recognized. However, we know that the  
99 critical side is assigned figure substantially and significantly less often in *Inverted Intact* displays  
100 than *Upright Intact* displays (e.g., [2]); therefore, the AMT norms for *Inverted Intact* displays  
101 would not be informative with regards to figure assignment processes.

102 Critical sides for which inter-subject agreement is high will be considered good  
103 depictions of portions of familiar objects. We expected to obtain high inter-subject agreement for  
104 the critical sides of many of the *Upright Intact* displays (that were designed to depict the source  
105 stimuli), but not their variants which were intended to control for image features while reducing  
106 or eliminating effects of familiar configuration. For objects with distinctive parts, we expected  
107 that the parts might support some degree of inter-subject agreement for the critical sides of *Part-*  
108 *Rearranged* displays, although not as much as for the critical sides of *Upright Intact* displays.  
109 We note that our method assesses explicit identification of familiar configurations, which we

110 assume is related, but not identical, to implicit access to traces of previously seen objects that  
111 serves as a figural prior.

## Methods

### 112 **Participants**

113 Potential participants had to meet the eligibility criteria of (a) having completed 1000  
114 experiments or other data collection programs on AMT and (b) have achieved an approval rating  
115 of at least 95% (see [23]); 194 AMT participants met these criteria. Responses from 16 of these  
116 participants were excluded because they failed attention check trials (see Procedure); responses  
117 from four other participants were excluded because they were gibberish or non-words.  
118 Responses from the remaining 174 participants were analyzed.

119 Participants were compensated \$1.50 to complete the task. Pilot tests showed that the  
120 tasks took no more than 10 minutes to complete (and could be completed much faster).  
121 Therefore, the estimated rate of pay was at the very least \$9.00 per hour (above the US national  
122 minimum of \$7.25 in 2015 and 2016 when these data were gathered).

### 123 **Stimuli**

124 Bipartite displays are vertically elongated displays comprising two regions situated on the  
125 left and right sides of a central border. One region is black and the other white; they are  
126 presented on a medium gray background such that the black and white regions contrast equally  
127 with the background. Using AMT, we could not control exact luminance values on participants'  
128 screen. We used pixel RGB values of: black = [0 0 0], white = [255 255 255], gray = [182 182  
129 182]. These RGB values yielded luminance values of 0.12, 87.33, and 45.70 foot-lamberts  
130 respectively on the computers in our laboratory, though these surely differed for each individual  
131 AMT participant. The two regions are equated for area by equating the number of pixels in each

132 region (mean % pixels on the critical side = 49.99% for Intact displays and 50.00% for Part-  
133 Rearranged displays; see Appendix A for image characteristics). We tested 48 bipartite displays  
134 with critical sides sketching Upright Intact versions of the 48 familiar *source configurations*, 48  
135 upright Part-Rearranged versions of each of the source configurations, and 48 inverted Part-  
136 Rearranged versions of each of the source configurations. The 144 stimuli tested are listed in  
137 Table 1 and can be accessed online (<https://osf.io/j9kz2/>). Stimuli were 343 pixels high (H) and  
138 ranged from 111 to 350 pixels wide (W). AMT participants view the stimuli at different viewing  
139 distances and on screens with different sizes and different resolutions; hence, stimulus size was  
140 not matched across subjects in this experiment (although it was matched for the different display  
141 types individual participants viewed). However, the number of pixels in the stimuli uploaded to  
142 AMT was large enough that we could be reasonably confident that the stimuli were of  
143 sufficiently high resolution under these disparate conditions.

#### 144 **Procedure**

145 *Programs.* All 24 programs were created outside of AMT as HTML files using  
146 Javascript/CSS/HTML and the JQuery Javascript library (version 1.11.3, <https://jquery.com>), and  
147 were then copied as source code into AMT. Stimuli (i.e., instructions, bipartite displays) were  
148 hosted on Imgur (<https://imgur.com>); their URLs were referenced by the programs. In each  
149 program, 24 bipartite stimuli were shown (8 in each type of display); half of the critical sides of  
150 each type were black, and half were white; half were on the left and half were on the right. Each  
151 source stimulus was only presented in one of the three types of displays (*Upright Intact*, *Upright*  
152 *Part-Rearranged*, and *Inverted Part-Rearranged*) in each program. Two different groups of  
153 programs were published, each presenting 24 of the 48 source stimuli. There were 12 programs  
154 within each group of programs. Black/white contrast and left/right location of the critical sides

155 were balanced, and in each program one third of the stimuli were presented in each type of  
156 display (*Upright Intact*, *Upright Part-Rearranged*, and *Inverted Part-Rearranged*). Thus, across  
157 the 12 programs in each of the two groups, every stimulus was shown equally often in each of its  
158 three display types, and within display type, equally often with the critical sides in black/white  
159 and on the left/right.

160 Eligible participants could access only one program per group. Each program was viewed  
161 by 8 participants and participants never viewed the same stimulus more than once. In total, 32  
162 participants provided up to three responses for each of the critical and complementary sides of  
163 each configuration of each source stimulus. Of the 174 participants, 156 completed one program  
164 and provided responses for 24 of the bipartite stimuli; 18 participants completed two programs  
165 (in different groups) and provided responses for all 48 stimuli (16 of each type, no overlap in  
166 source stimulus).

167 Participants had up to one hour to complete the experiment (see footnote 2). Participants  
168 had to click a button to advance through the programs which were segmented into pages. The  
169 first page was a consent form that was approved by the Human Subjects Protections Program at  
170 the University of Arizona. Participants could continue onto the rest of the program only after  
171 they indicated that they had read the consent form and agreed to participate in the experiment.  
172 The second page was an instruction page. The instructions showed a sample trial, and informed  
173 participants to use the three response boxes on the right and left sides of the screen to list up to  
174 three familiar objects resembled by the corresponding regions of the bipartite display.  
175 Participants were told they could type an 'x' in the top response box if they did not see any  
176 familiar objects on that side. Participants could not proceed to the next trial (the next page)



177 without entering something in the top response boxes on the left and right sides. Figure 2 shows  
178 a sample trial.

179 Figure 2. A sample trial from Experiment 1. Participants were presented with a bipartite stimulus; here, an *Upright*  
180 *Intact* version of the source stimulus “guitar” sketched in black on the left of the central border. Six response boxes  
181 were provided (three per side). They used these boxes to list any familiar objects resembled by each side of the  
182 stimulus. A button labelled ‘Next Trial’ would lead them to the next trial when they were ready.

183  
184 After the instructions, participants completed 26 experimental trials: 24 trials with  
185 bipartite displays and two attention check trials. Of the 24 trials with bipartite displays, eight  
186 trials tested each of the three configuration types (upright Intact, upright Part-Rearranged,  
187 inverted Part-Rearranged). For each display type, the critical side was equally likely to be black  
188 or white, and located on the left or right within each program. On the two attention check trials,  
189 the bipartite stimulus was replaced with a white box. Inside the white box were written  
190 instructions on how to respond (e.g., “please write ‘fear’ in the top left and right box”). The  
191 attention check trials were included to make sure that participants were performing the task. If  
192 participants responded incorrectly on the attention check trials, their responses to the bipartite  
193 displays were discarded before they were viewed by an experimenter. The 26 experimental trials  
194 were presented in a random order. Time to complete each trial was unrestricted. After the  
195 experimental trials, participants were asked to provide any feedback or thoughts on a final page  
196 and were prompted to submit their responses.

### 197 **Data Analysis**

198 Responses from all of the programs were sorted according to source stimulus and display  
199 type (*Upright Intact*, *Upright Part-Rearranged*, or *Inverted Part-Rearranged*), and bipartite  
200 stimulus side (critical or complementary). Responses to the critical and complementary sides  
201 were collapsed over contrast (black/white) and location relative to the central border (left/right).  
202 Responses were compiled across 32 participants (up to 96 responses per side given that

203 participants could make up to three responses per side). Next, scorers cleaned up typing/spelling  
204 errors (e.g., consolidating ‘trumpet’ and ‘trumpit’) and grouped responses that seemed to denote  
205 similar object categories (e.g., ‘clarinet’ and ‘trumpet’ were grouped into single category  
206 response for the “Trumpet” source stimulus). These groupings were the basis for the inter-subject  
207 agreement scores (see below). Because participants differed in the level of specificity with which  
208 they identified objects resembled by the stimuli, responses made by different subjects were  
209 considered the same if they labeled the same basic-level object with a different name. For  
210 example, the responses ‘dwelling’ and ‘house’ made by different participants were both taken as  
211 evidence that the House source stimulus had been recognized at the basic level. If a single  
212 participant made two responses that were synonymous for a given region (i.e., ‘house’ and  
213 ‘dwelling’ as two different responses for the critical side of the border of the *Upright Intact*  
214 version of the House source stimulus), only one was counted. Each grouping of responses into  
215 one object category was initially made by a naïve scorer; their groupings were checked and  
216 confirmed by a second naïve scorer. Differences were referred to and resolved by the authors. A  
217 single object category could contain only one response per participant.

## 218 **Results**

219 The best fitting object category perceived for a given side of the border of a given  
220 stimulus was selected as the one identified by the largest number of participants. Percent inter-  
221 subject agreement regarding this object category was determined by dividing the number of  
222 participants who made this response by 32 (the maximum number of responses if every  
223 participant contributed one response). Inter-subject agreement percentages are presented in Table  
224 1. The identity of the source stimuli is listed in the left column. The three variants of the source  
225 stimuli – *Upright Intact*, *Upright Part-Rearranged*, and *Inverted Part Rearranged* – are arranged

226 from left to right with five columns embedded under each type. These five columns list from left  
227 to right (1) the object category with the highest inter-subject agreement for the critical side of the  
228 central border, (2) the percent inter-subject agreement for that object category, (3) the object  
229 category with the highest inter-subject agreement for the complementary side of the central  
230 border, (4) the percent inter-subject agreement for that object category, and (5) the difference  
231 between the inter-subject agreement percentages for the critical and complementary sides of the  
232 border.

233

234

235

## NORMATIVE DATA FOR OMEFA-II

236 Table 1. Percent inter-subject agreement and difference scores for each side of three types of OMEFA-II bipartite stimuli: *Upright Intact*, *Upright Part-Rearranged*, and *Inverted*  
 237 *Part-Rearranged*. The five columns under each type list (1-2) the interpretation with the highest inter-subject agreement for the critical side, (3-4) the interpretation with the  
 238 highest inter-subject agreement for the complementary side, and (5) the critical – complementary difference. The first column denotes the source object, the object intended to be  
 239 depicted on the critical side of the border of *Upright Intact* stimuli. Stimuli are ordered from top to bottom by percent inter-subject agreement regarding the interpretation for the  
 240 critical side of the border. For the four objects listed in light grey at the bottom, either the interpretation with the highest inter-subject agreement was different from the source  
 241 object or the critical – complementary difference was 0. The interpretations shown in bold for *Upright Part Rearranged* and *Inverted Part Rearranged* stimuli where neither side  
 242 depicts an intact familiar object are interpretations that match the source object. Note that the Mickey Mouse stimulus is labelled as “Mickey” in the result and stimulus files.

| Source        | Upright Intact |       |                       |             |      | Upright Part-Rearranged  |             |                  |            |       | Inverted Part-Rearranged |             |                   |             |       |
|---------------|----------------|-------|-----------------------|-------------|------|--------------------------|-------------|------------------|------------|-------|--------------------------|-------------|-------------------|-------------|-------|
|               | Critical       | %     | Comp                  | %           | Diff | Critical                 | %           | Comp             | %          | Diff  | Critical                 | %           | Comp              | %           | Diff  |
| Lamp          | Lamp           | 100.0 | Furniture             | 18.8        | 81.3 | Keyhole                  | 46.9        | Vase             | 9.4        | 37.5  | Vase                     | 28.1        | 3' / 'E'          | 9.4         | 18.8  |
| Palm Tree     | Palm tree      | 100.0 | Monster               | 12.5        | 87.5 | <b>Palm Tree / Tree</b>  | <b>59.4</b> | Saw Blade        | 15.6       | 43.8  | Cactus                   | 18.8        | Face              | 15.6        | 3.1   |
| Rhino         | Rhino          | 100.0 | Ghost / Monster       | 18.8        | 81.3 | Dinosaur                 | 18.8        | Dog              | 18.8       | 0.0   | Person                   | 28.1        | Gargoyle          | 21.9        | 6.3   |
| Elephant      | Elephant       | 96.9  | Landscape             | 9.4         | 87.5 | <b>Elephant</b>          | <b>90.6</b> | Person           | 15.6       | 75.0  | <b>Elephant</b>          | <b>50.0</b> | Mouth             | 9.4         | 40.6  |
| Eagle         | Eagle          | 96.9  | Landscape             | 9.4         | 87.5 | <b>Bird</b>              | <b>18.8</b> | Face             | 34.4       | -15.6 | Man with Hat             | 37.5        | Person            | 9.4         | 28.1  |
| Duck          | Duck           | 96.9  | Tree                  | 15.6        | 81.3 | <b>Duck</b>              | <b>75.0</b> | Cliff            | 9.4        | 65.6  | Person                   | 15.6        | Seahorse          | 40.6        | -25.0 |
| Guitar        | Guitar         | 96.9  | Dock                  | 6.3         | 90.6 | Chess Piece              | 15.6        | <b>Guitar</b>    | <b>6.3</b> | 9.4   | Cloud                    | 9.4         | Gun               | 6.3         | 3.1   |
| Hand          | Hand           | 96.9  | Waves                 | 9.4         | 87.5 | <b>Fingers / Hand</b>    | <b>84.4</b> | Bird             | 28.1       | 56.3  | <b>Fingers</b>           | <b>56.3</b> | Claw              | 15.6        | 40.6  |
| Train         | Train          | 96.9  | Faucet                | 18.8        | 78.1 | Person                   | 50.0        | Gun              | 25.0       | 25.0  | Faucet                   | 21.9        | Face              | 25.0        | -3.1  |
| Mickey Mouse* | Mickey Mouse   | 96.9  | Waves                 | 6.3         | 90.6 | <b>Mickey Mouse</b>      | <b>34.4</b> | Landscape        | 9.4        | 25.0  | Clown                    | 25.0        | Knife             | 6.3         | 18.8  |
| Trumpet       | Trumpet        | 96.9  | <b>Instrument</b>     | <b>15.6</b> | 81.3 | <b>Instrument</b>        | <b>81.3</b> | Guitar           | 21.9       | 59.4  | <b>Instrument</b>        | <b>56.3</b> | <b>Instrument</b> | <b>37.5</b> | 18.8  |
| Boot          | Boot           | 93.8  | Face                  | 37.5        | 56.3 | <b>Shoe</b>              | <b>56.3</b> | Mouth            | 12.5       | 43.8  | Mouth                    | 12.5        | Lips              | 9.4         | 3.1   |
| Flower        | Flower         | 93.8  | Person                | 6.3         | 87.5 | <b>Flower</b>            | <b>31.3</b> | Rhino            | 6.3        | 25.0  | <b>Plant</b>             | <b>50.0</b> | Leaf              | 9.4         | 40.6  |
| Owl           | Owl            | 93.8  | Wave                  | 6.3         | 87.5 | <b>Bird</b>              | <b>40.6</b> | Person           | 12.5       | 28.1  | <b>Bird</b>              | <b>50.0</b> | Monster           | 18.8        | 31.3  |
| Pineapple     | Pineapple      | 93.8  | Wave                  | 6.3         | 87.5 | Clouds                   | 21.9        | Leaf             | 12.5       | 9.4   | Berries                  | 18.8        | Leaf              | 31.3        | -12.5 |
| Foot          | Foot           | 93.8  | Stalactites / Icicles | 15.6        | 78.1 | Baby                     | 34.4        | Scarf            | 12.5       | 21.9  | Hair                     | 12.5        | Plant             | 18.8        | -6.3  |
| Butterfly     | Butterfly      | 93.8  | Mountainside          | 9.4         | 84.4 | <b>Butterfly / Wings</b> | <b>37.5</b> | Brass Instrument | 15.6       | 21.9  | <b>Butterfly</b>         | <b>15.6</b> | Trumpet           | 12.5        | 3.1   |
| House         | House          | 93.8  | Steam Whistle         | 15.6        | 78.1 | Nose                     | 12.5        | Diving Board     | 12.5       | 0.0   | Shelf                    | 15.6        | Heartbeat Signal  | 6.3         | 9.4   |
| Face          | Face           | 90.6  | Vase                  | 15.6        | 75.0 | <b>Face</b>              | <b>59.4</b> | Vase             | 18.8       | 40.6  | <b>Face</b>              | <b>25.0</b> | <b>Face</b>       | <b>71.9</b> | -46.9 |
| Faucet        | Faucet         | 90.6  | Face                  | 18.8        | 71.9 | <b>Faucet</b>            | <b>81.3</b> | Puzzle Piece     | 12.5       | 68.8  | <b>Faucet</b>            | <b>53.1</b> | Puzzle Piece      | 12.5        | 40.6  |
| Snowman       | Snowman        | 90.6  | Waves                 | 6.3         | 84.4 | Bird                     | 28.1        | Bridge           | 6.3        | 21.9  | Cloud                    | 28.1        | Waves             | 6.3         | 21.9  |
| Toilet        | Toilet         | 90.6  | Mouth                 | 9.4         | 81.3 | Sink                     | 34.4        | Building         | 9.4        | 25.0  | Shoe                     | 59.4        | Desk              | 15.6        | 43.8  |
| Tree          | Tree           | 90.6  | Rock formation        | 28.1        | 62.5 | Mountain                 | 21.9        | Mountain         | 18.8       | 3.1   | Mountains                | 21.9        | Mountain          | 25.0        | -3.1  |
| Watering Can  | Watering Can   | 90.6  | Person                | 9.4         | 81.3 | <b>Watering Can</b>      | <b>50.0</b> | Tool             | 9.4        | 40.6  | <b>Spout</b>             | <b>59.4</b> | Mouth             | 15.6        | 43.8  |
| Umbrella      | Umbrella       | 90.6  | Cat                   | 21.9        | 68.8 | <b>Umbrella</b>          | <b>87.5</b> | Ocean            | 12.5       | 75.0  | <b>Umbrella</b>          | <b>68.8</b> | Mouth             | 18.8        | 50.0  |

NORMATIVE DATA FOR OMEFA-II

| Source       | Upright Intact  |      |               |      |      | Upright Part-Rearranged |             |                |             |       | Inverted Part-Rearranged |             |                     |             |       |
|--------------|-----------------|------|---------------|------|------|-------------------------|-------------|----------------|-------------|-------|--------------------------|-------------|---------------------|-------------|-------|
|              | Critical        | %    | Comp          | %    | Diff | Critical                | %           | Comp           | %           | Diff  | Critical                 | %           | Comp                | %           | Diff  |
| Woman        | Woman           | 87.5 | Waves         | 9.4  | 78.1 | Lamp                    |             | Plant          | 12.5        | 30.5  | Vase                     | 15.6        | Person              | 12.5        | 3.1   |
| Anchor       | Anchor          | 84.4 | Puzzle Piece  | 12.5 | 71.9 | Tree                    | 28.1        | Mouth          | 25.0        | 3.1   | Tree                     | 43.8        | Face                | 12.5        | 31.3  |
| Axe          | Axe             | 84.4 | Hand/Fingers  | 15.6 | 68.8 | <b>Axe</b>              | <b>34.4</b> | Anvil          | 15.6        | 18.8  | <b>Axe</b>               | <b>53.1</b> | Corkscrew           | 18.8        | 34.4  |
| Dog          | Dog             | 84.4 | Face          | 12.5 | 71.9 | Mountain                | 15.6        | Mountain       | 25.0        | -9.4  | Person                   | 43.8        | Mountain            | 25.0        | 18.8  |
| Seahorse     | Seahorse        | 84.4 | Tree          | 12.5 | 71.9 | <b>Seahorse</b>         | <b>25.0</b> | Winged Animal  | 21.9        | 3.1   | Praying People           | 28.1        | Dragon              | 18.8        | 9.4   |
| Cow          | Cow             | 81.3 | Face          | 12.5 | 68.8 | Mouth                   | 37.5        | Dog            | 12.5        | 25.0  | Mouth                    | 18.8        | Mouth               | 6.3         | 12.5  |
| Lightbulb    | Lightbulb       | 81.3 | Vase          | 15.6 | 65.6 | Vase                    | 46.9        | Knife          | 15.6        | 31.3  | Breasts                  | 12.5        | Vase                | 18.8        | -6.3  |
| Bell         | Bell            | 78.1 | Vase / Urn    | 18.8 | 59.4 | Lamp                    | 68.8        | Person         | 15.6        | 53.1  | Lamp                     | 15.6        | Lamp                | 25.0        | -9.4  |
| Fire Hydrant | Fire Hydrant    | 78.1 | Traffic Light | 9.4  | 68.8 | Smokestack              | 12.5        | Building       | 31.3        | -18.8 | Key                      | 25.0        | Building            | 28.1        | -3.1  |
| Teapot       | Teapot          | 75.0 | Bearded Man   | 21.9 | 53.1 | Tree                    | 21.9        | Face           | 6.3         | 15.6  | Person / Child           | 53.1        | Mountain            | 18.8        | 34.4  |
| Wine Glass   | Wine Glass      | 75.0 | Cleaver       | 9.4  | 65.6 | <b>Wine Glass</b>       | <b>37.5</b> | Wood           | 12.5        | 25.0  | Top Hat                  | 78.1        | Mouth               | 18.8        | 59.4  |
| Maple Leaf   | Maple leaf      | 71.9 | Face          | 21.9 | 50.0 | Crystals                | 9.4         | Mountain       | 21.9        | -12.5 | <b>Leaf</b>              | <b>9.4</b>  | Cityscape           | 15.6        | -6.3  |
| Pig          | Pig             | 71.9 | Canyon        | 6.3  | 65.6 | Alien                   | 12.5        | <b>Pig</b>     | <b>18.8</b> | -6.3  | Plant                    | 15.6        | <b>Pig</b>          | <b>56.3</b> | -40.6 |
| Spray Bottle | Spray Bottle    | 68.8 | Person        | 15.6 | 53.1 | Water Fountain          | 34.4        | Cartoon / Face | 34.4        | 0.0   | Faucet                   | 21.9        | Face                | 34.4        | -12.5 |
| Grapes       | Grapes          | 65.6 | Stairs        | 6.3  | 59.4 | Clouds                  | 56.3        | Tree / Leaf    | 46.9        | 9.4   | Clouds                   | 75.0        | Leaf                | 59.4        | 15.6  |
| Turtle       | Turtle          | 56.3 | Cave          | 6.3  | 50.0 | Rabbit                  | 34.4        | Knife          | 9.4         | 25.0  | <b>Turtle</b>            | <b>40.6</b> | Seahorse            | 9.4         | 31.3  |
| Wrench       | Wrench          | 53.1 | Face          | 18.8 | 34.4 | Rhino                   | 9.4         | Tree           | 9.4         | 0.0   | Tree                     | 43.8        | Face                | 21.9        | 21.9  |
| Bottle       | Bottle          | 40.6 | Column        | 15.6 | 25.0 | Stove/Furnace           | 18.8        | Glass          | 18.8        | 0.0   | Lamp post                | 25.0        | <b>Bottle</b>       | <b>28.1</b> | -3.1  |
| Bear         | Bear            | 37.5 | Mountains     | 9.4  | 28.1 | Feet                    | 9.4         | Cityscape      | 12.5        | -3.1  | Crowd                    | 9.4         | Mountainside        | 9.4         | 0.0   |
| Rabbit       | Lips            | 34.4 | Face          | 25.0 | 9.4  | Face                    | 18.8        | Waves          | 6.3         | 12.5  | Person                   | 18.8        | Waves               | 9.4         | 9.4   |
| Jet          | Man w long face | 34.4 | Gun           | 12.5 | 21.9 | Nose                    | 25.0        | Mouth          | 12.5        | 12.5  | Airplane                 | 15.6        | Tree                | 12.5        | 3.1   |
| Apple        | Apple           | 31.3 | Neck          | 31.3 | 0.0  | Chin                    | 18.8        | Hand           | 9.4         | 9.4   | Nose                     | 12.5        | Waves               | 9.4         | 3.1   |
| Pear         | Guitar          | 78.1 | Waves         | 6.3  | 71.9 | Woman                   | 31.3        | Waves          | 18.8        | 12.5  | Female Body              | 46.9        | Stringed Instrument | 18.8        | 28.1  |
| Mean (48)    |                 | 81.3 |               | 14.0 | 67.3 |                         | 37.9        |                | 16.2        | 21.7  |                          | 32.5        |                     | 19.9        | 12.6  |
| Mean (44)    |                 | 84.7 |               | 13.6 | 71.1 |                         | 39.3        |                | 16.6        | 22.6  |                          | 33.3        |                     | 20.6        | 12.7  |

245 **Upright Intact displays**

246 **Critical side.** Mean inter-subject agreement for the *Upright Intact* displays was 81.3%,  
247 indicating that on average the critical sides of the borders are good depictions of the source  
248 stimuli: The source stimuli are sorted by inter-subject agreement with one exception – the Pear  
249 stimulus is listed last because 78.1% of participants misidentified the critical side of the border as  
250 a “guitar.” The critical side of the upright Intact Jet display was also misidentified: 34.4% of  
251 participants identified it as a “face.” Given that inter-subject agreement was > 90% for the  
252 critical sides of source stimuli Guitar and Face, we recommend dropping these stimuli. We also  
253 recommend dropping the Rabbit stimulus because the critical side was identified as “lips” by the  
254 largest percentage of participants (34.4%) rather than as a rabbit.

255 **Complementary side.** The data indicate that the complementary sides of the borders of  
256 *Upright Intact* displays are not good depictions of well-known objects. Mean inter-subject  
257 agreement regarding objects denoted on the complementary side was 14.0%. We originally  
258 intended to use only bipartite displays in which participants indicated that the complementary  
259 side didn't resemble anything familiar. In our early work, we found this was nearly impossible,  
260 so we instead set an upper cut-off of 23% inter-subject agreement on a single interpretation for  
261 portions of displays that could serve as complementary sides, because they depicted nominally  
262 “novel” objects [16]. We no longer set an a priori cutoff for the complementary sides: Inter-  
263 subject agreement for the object category resembled by the complementary side of the border of  
264 five of the 48 *Upright Intact* displays was  $\geq 25\%$  (source stimuli: Boot, Tree, Fire Hydrant,  
265 Rabbit, and Apple), although individual experimenters may choose to do so.

266 We note that the interpretations listed for the complementary side of the border of 14 of  
267 the *Upright Intact* displays were landscape features rather than objects: see responses of

268 “landscape,” “waves,” “mountainside,” “rock formation,” building,” “canyon,” and “cave” (only  
269 “building” and “rock formation” generated  $\geq 25\%$  agreement). It is not clear whether past  
270 experience with landscape features influences figure assignment (although many of the  
271 landscape features named here do occlude other parts of a scene). Nevertheless, we list them in  
272 Table 1 because they produced the highest inter-subject agreement.

273 **Critical – complementary difference.** The difference between the inter-subject  
274 agreement for the critical and complementary sides of the border shown in the fifth column  
275 under *Upright Intact* displays was large – 67.3% on average. The *critical – complementary*  
276 *difference* was 0.00 for one of the source stimuli (Apple), however which leads us to suggest  
277 omitting this stimulus from the OMEFA II set.

278 **Summary for Upright Intact displays.** Based on the inter-subject agreement for the  
279 *Upright Intact* displays, we recommend omitting the last 4 stimuli on the list (Rabbit, Jet, Apple,  
280 and Pear). In what follows, we omit discussions of the data obtained for the other variants of  
281 these displays. That leaves a set of 44 *Upright Intact* displays, with mean inter-subject agreement  
282 of 84.7% for the critical side (range = 37.5% - 100%); 13.6% for the complementary side (range  
283 = 6.3% - 37.5%) and a mean *critical – complementary difference* of 71.1%, (range 25% - 90.6%)

#### 284 **Upright Part-Rearranged Displays**

285 **Critical side.** The mean inter-subject agreement regarding the category of the objects  
286 resembled by the critical side of the border of *Upright Part-Rearranged* displays was 39.3% (not  
287 counting the four source stimuli already rejected). This percentage indicates lower inter-subject  
288 agreement than for the *Upright Intact* displays, which we take as evidence that *Upright Part-*  
289 *Rearranged* displays are less likely to activate memory traces of well-known objects. For the  
290 critical sides of 18 of the *Upright Part-Rearranged* stimuli, however, the highest inter-subject

291 agreement was for the same object category as identified for the critical sides of *Upright Intact*  
292 displays (see interpretations in bold). These responses are probably based on identification of a  
293 diagnostic part (e.g., the elephant's trunk). The mean inter-subject agreement for these 18 stimuli  
294 (54.7%) was lower than for the corresponding *Upright Intact* stimuli (92.4%). The mean inter-  
295 subject agreement regarding the identity of the object denoted by the remaining 26 stimuli was  
296 low (28.6%) although not as low as for the complementary sides of these displays or of *Upright*  
297 *Intact* displays (see below). Perhaps configurations created from the parts of well-known objects  
298 resemble familiar objects more than configurations created from complements of those parts. For  
299 the critical side of the remaining 26 *Upright Part-Rearranged* stimuli, inter-subject agreement  
300 indicated that subjects perceived objects different from the source objects; for 11 of these  
301 displays inter-subject agreement was  $\geq 25\%$  (source stimuli: lamp, train, foot, snowman, toilet,  
302 woman, cow, light bulb, bell, spray bottle, grapes, turtle).

303 **Complementary side.** Mean inter-subject agreement regarding the category of the  
304 objects resembled by the complementary side of the border was low (16.6%), and approximately  
305 the same as for the complementary side of the *Upright Intact* displays. Inter-subject agreement  
306 was  $\geq 25\%$  for the complementary sides of eight of the source stimuli (Eagle, Hand, Train,  
307 Anchor, Dog, Fire Hydrant, Spray Bottle, and Grapes). Two of these interpretations (“mountain”  
308 and “building”) were landscape features rather than objects per se; one was the source object  
309 (Pig).

310 **Critical – complementary differences.** The mean difference between the inter-subject  
311 agreement for the critical and complementary sides of the border observed for *Upright Part-*  
312 *Rearranged* displays was 22.6%, quite a bit smaller than for *Upright Intact* displays. The *critical*  
313 *– complementary differences* were negative for five stimuli. Most of these negative differences



314 were small; the largest negative difference (-18.8) was obtained when the inter-subject  
315 agreement for the complementary side was a landscape feature (“building”).

316 **Summary for upright part-rearranged displays.** For the current set of 44 stimuli, the  
317 mean inter-subject agreement was 39.4% for the critical side (range = 9.4% - 90.6%); 16.6% for  
318 the complementary side (range = 6.3% - 34.4%) and a mean *critical – complementary difference*  
319 of 22.6%, (range -18.8% - 75.0%). As manifested by participants’ explicit responses, overall, the  
320 critical sides of the *Upright Part-Rearranged* displays are less likely to activate traces of  
321 previously seen objects. Inter-subject agreement was higher for some of the displays, perhaps  
322 because of the presence of diagnostic parts.

### 323 **Inverted Part-Rearranged Displays**

324 **Critical side.** The mean inter-subject agreement regarding well known objects resembled  
325 by the critical side of the border of *Inverted Part-Rearranged* displays (33.3%) was slightly  
326 lower than for the *Upright Part-Rearranged* displays and substantially lower than for the  
327 *Upright Intact* displays. We take these data as evidence that the critical sides of these stimuli do  
328 not highly activate memory traces of well-known objects. For 13 of the 44 *Inverted Part-*  
329 *Rearranged* stimuli, however, the largest percentage of participants identified the critical side as  
330 the source object. Once again, we hypothesize that this high inter-subject agreement is based on  
331 the identification of diagnostic parts: 11 of these 13 displays are a subset of the 17 *Upright Part-*  
332 *Rearranged* displays for which participants agreed in naming the source object on the critical  
333 side of the border. The mean inter-subject agreement for these 11 *Inverted Part-Rearranged*  
334 displays (51.1%) was substantially lower than for the corresponding *Upright Intact* displays  
335 (89.2%) but only slightly lower than for the corresponding *Upright Part-Rearranged* displays

336 (61.4%). The mean inter-subject agreement for the critical sides of the remaining 31 *Inverted*  
337 *Part-Rearranged* displays was 28.3%.

338 **Complementary side.** Inter-subject agreement regarding the object category resembled  
339 by the complementary side of the border of the 44 stimuli under consideration was 20.6%. For  
340 five of the displays, the highest inter-subject agreement was for the source object (source objects:  
341 Face, Woman, Trumpet, Bottle, and Pig). For the Face and the Pig source stimuli, the inter-  
342 subject agreement regarding the source object interpretation for the complementary side of the  
343 border was higher than for the critical side of the border, leading to negative *critical* –  
344 *complementary* differences (see below). For nine other displays, inter-subject agreement that the  
345 complementary side of the border denoted a different object was  $\geq 25\%$  (Duck, Train, Pineapple,  
346 Tree, Dog, Bell, Fire Hydrant, Spray Bottle, and Grapes). Three of these interpretations were  
347 landscape features rather than objects, and two were simply parts (e.g., “leaf”).

348 **Critical – complementary difference.** The mean difference between the inter-subject  
349 agreement for the critical and complementary sides of the border observed for *Inverted Part-*  
350 *Rearranged* displays was 12.7%, smaller than for the *Upright Part-Rearranged* displays. The  
351 smaller difference was obtained because between-subjects agreement was both lower for the  
352 critical side and higher for the complementary side. The *critical – complementary differences*  
353 were negative for 13 stimuli. The largest negative difference (-46.9%) was obtained when the  
354 higher inter-subject agreement for the complementary side was for “face,” which may be a  
355 manifestation of pareidolia.

## 356 **Discussion**

357 We present OMEFA-II, a new, high-resolution set of bipartite stimuli (N = 44 source  
358 stimuli) with normative data regarding explicit judgments of the familiar objects denoted on both

359 the critical and complementary sides of the central borders of three different display types:  
360 *Upright Intact* displays (N = 44; 88 sides), *Upright Part-Rearranged* displays (N = 44; 88 sides),  
361 and *Inverted Part-Rearranged* displays (N = 44; 88 sides). These comprehensive norms allow  
362 the difference in inter-subject agreement for the critical and complementary sides to be  
363 calculated for 132 displays. The OMEFA-II displays and the normative data reported here will  
364 be valuable for experiments conducted with participants with brain damage as well as those with  
365 intact brains for investigating questions concerning parts and wholes, high-level influences on  
366 perception, and for tests of competitive models of perception.

367         The inter-subject agreement measured here is one means of quantifying the extent to  
368 which traces of previously seen objects are activated by different sides of a border, but this  
369 activation occurs implicitly during perceptual organization. Behavioral measures such as the  
370 probability of perceiving the figure on the critical side of the border, event-related potentials  
371 (ERPs), and the blood oxygen dependent (BOLD) response in fMRI experiments, perhaps in  
372 combination with multi-voxel pattern analysis (MVPA), may also quantify activation of traces of  
373 previously seen objects. Correlating the data presented in Table 1 with these indices may be  
374 fruitful in understanding object perception in general, figure assignment in particular, and any  
375 underlying competition between objects that might be perceived on opposite sides of a border.

376         In addition to inter-subject agreement for the critical and complementary sides of the  
377 border individually, we report the difference in inter-subject agreement regarding the objects  
378 sketched on the critical versus the complementary sides of the border. On current inhibitory  
379 competition accounts of figure assignment (e.g., [24, 25]), this difference may better predict  
380 whether a figure will be perceived on the critical side of a border than the inter-subject

381 agreement regarding the critical side alone. The comprehensive set of norms presented here  
382 allows future experiments to test which is the better predictor.

383         Although inter-subject agreement is informative about *which* traces of previously seen  
384 objects are activated, they cannot assess *how* quickly they are activated. In previous research,  
385 substantially larger effects of familiar configuration were found for *Upright* than *Inverted Intact*  
386 displays (e.g., [2, 13, 16, 17]). This orientation-dependent difference has been attributed to the  
387 time required for evidence to accumulate in neural populations coding for the familiar object  
388 (longer for inverted than upright displays; [26]). The orientation-dependency of the familiar  
389 configuration prior has been taken to indicate that priors for figure assignment must be available  
390 quickly in order to influence figure assignment (for review see [15]). Indeed, once the critical  
391 sides of *Inverted Intact* displays are perceived as figures, the familiar objects they portray can  
392 often be identified. (This is why we did not obtain norms for the critical side of *Inverted Intact*  
393 displays.) Nevertheless, knowing that critical sides depict inverted familiar objects does not  
394 increase the likelihood of seeing the figure on the side where an inverted version of the intact  
395 object is sketched [13].

396         For some of the *Upright* and *Inverted Part-Rearranged* displays, sizeable inter-subject  
397 agreement seemed to be based on diagnostic parts. In future research it will be interesting to test  
398 whether access to object categories via diagnostic parts as evidenced by these explicit responses  
399 generated while the stimuli were exposed for long durations is sufficient for past experience  
400 effects on figure assignment. Given the large set normed here this can be done for *Upright Part-*  
401 *Rearranged* displays by comparing performance with the 18 displays for which the largest  
402 percentage of participants identified the source stimulus and the remaining 26 displays for which  
403 the largest percentage of participants did not identify the source stimulus. (For the *Inverted Part-*



427 respectively). The stimuli, as well as Excel files of Table 1, Appendix A, the AMT data sorted by  
428 stimulus type (and within stimulus type by critical and complementary side), and the full data set  
429 are available online (<https://osf.io/j9kz2/>).

## References

- 430
- 431 [1] Hochberg J. Perception I: Color and shape. In: Kling JW, Riggs LA, editors. Woodworth and  
432 Schlossberg's experimental psychology. New York, NY; Holt, Rinehart and Winston, 1971:395-  
433 474.
- 434 [2] Peterson MA, Gibson BS. Must figure-ground organization precede object recognition? An  
435 assumption in peril. Psychol Sci. 1994;5:253-9. doi: [10.1111/j.1467-9280.1994.tb00622.x](https://doi.org/10.1111/j.1467-9280.1994.tb00622.x)
- 436 [3] Pomerantz JR, Kubovy M. Theoretical approaches to perceptual organization: Simplicity and  
437 likelihood principles. In: Boff KR, Kaufman L, Thomas JP, editors. Handbook of perception and  
438 human performance. New York, NY: Wiley; 1986;36:36-1-46.
- 439 [4] Rubin, E. Figure and ground. In Beardslee DC, Wertheimer M, editors. Readings in  
440 perception. Princeton, NJ: Van Nostrand, 1915/1958:194-203.
- 441 [5] Hulleman J, Humphreys GW. A new cue to figure-ground coding: Top-bottom polarity.  
442 Vision Res. 2004;44:2779-91. doi: [10.1016/j.visres.2004.06.012](https://doi.org/10.1016/j.visres.2004.06.012)
- 443 [6] Kanizsa G, Gerbino W. Convexity and Symmetry in figure-ground organization. In Henle M,  
444 editor. Vision and artifact. New York, NY: Springer, 1976:25-33.
- 445 [7] Mojica AJ, Peterson MA. Display-wide influences on figure-ground perception: The case of  
446 symmetry. Atten Percept Psychophys. 2014;76:1069-84. doi: 10.3758/s13414-014-0646-y
- 447 [8] O'Shea RP, Blackburn SG, Ono H. Contrast as a depth cue. Vision Res. 1994;34:1595-604.  
448 doi: [10.1016/0042-6989\(94\)90116-3](https://doi.org/10.1016/0042-6989(94)90116-3)
- 449 [9] Peterson MA, Salvagio E. Inhibitory competition in figure-ground perception: Context and  
450 convexity. J Vis. 2008;8:1-13. doi: 10.1167/8.16.4
- 451 [10] Vecera SP, Vogel EK, Woodman GF. Lower region: A new cue for figure-ground  
452 assignment. J Exp Psycho Gen. 2002;131:194-205. doi: [10.1037/0096-3445.131.2.194](https://doi.org/10.1037/0096-3445.131.2.194)

- 453 [11] Peterson MA, Kimchi R. Perceptual organization in vision. In: Reisberg D, editor. The  
454 Oxford handbook of cognitive psychology. Oxford University Press, 2013:9-31.
- 455 [12] Peterson MA, Gibson BS. The initial identification of figure-ground relationships:  
456 Contributions from shape recognition processes. Bull Psychon Soc. 1991;29:199-202. doi:  
457 [10.3758/BF03335234](https://doi.org/10.3758/BF03335234)
- 458 [13] Peterson MA, Harvey EM, Weidenbacher HJ. Shape recognition contributions to figure-  
459 ground reversal: Which route counts?. J Exp Psychol Hum Percept Perform. 1991;17:1075-89.  
460 doi: [10.1037/0096-1523.17.4.1075](https://doi.org/10.1037/0096-1523.17.4.1075)
- 461 [14] Peterson MA. Object recognition processes can and do operate before figure-ground  
462 organization. Curr Dir Psychol Sci. 1994;3:105-11. doi: [10.1111/1467-8721.ep10770552](https://doi.org/10.1111/1467-8721.ep10770552)
- 463 [15] Peterson MA. Past experience and meaning affect object detection: A hierarchical Bayesian  
464 approach. In Federmeier KD, Beck DM, editors. Psychology of learning and motivation:  
465 Knowledge and vision. Cambridge, MA: Academic Press, 2019;70:223.
- 466 [16] Gibson BS, Peterson MA. Does orientation-independent object recognition precede  
467 orientation-dependent recognition? Evidence from a cuing paradigm. J Exp Psychol Hum  
468 Percept Perform. 1994;20:299. doi: [10.1037/0096-1523.20.2.299](https://doi.org/10.1037/0096-1523.20.2.299)
- 469 [17] Peterson MA, Gibson BS. Object recognition contributions to figure-ground organization:  
470 Operations on outlines and subjective contours. Percept Psychophys. 1994;56:551-64. doi:  
471 [10.1111/j.1467-9280.1994.tb00622.x](https://doi.org/10.1111/j.1467-9280.1994.tb00622.x)
- 472 [18] Barense MD, Ngo JK, Hung LH, Peterson MA. Interactions of memory and perception in  
473 amnesia: The figure-ground perspective. Cereb Cortex. 2012;22:2680-91. doi:  
474 [10.1093/cercor/bhr347](https://doi.org/10.1093/cercor/bhr347)



- 475 [19] Peterson MA, De Gelder B, Rapcsak SZ, Gerhardstein PC, Bachoud-Lévi AC. Object  
476 memory effects on figure assignment: Conscious object recognition is not necessary or  
477 sufficient. *Vision Res.* 2000;40:1549-67. doi: [10.1016/S0042-6989\(00\)00053-5](https://doi.org/10.1016/S0042-6989(00)00053-5)
- 478 [20] Peterson MA, Gerhardstein PC, Mennemeier M, Rapcsak SZ. Object-centered attentional  
479 biases and object recognition contributions to scene segmentation in left-and right-hemisphere-  
480 damaged patients. *Psychobiology.* 1998;26:357-70. doi: 10.3758/BF03330622
- 481 [21] Cacciamani L, Wager E, Peterson MA, Scalf PE. Age-related changes in perirhinal cortex  
482 sensitivity to configuration and part familiarity and connectivity to visual cortex. *Front Aging*  
483 *Neurosci.* 2017;9:291. doi: [10.3389/fnagi.2017.00291](https://doi.org/10.3389/fnagi.2017.00291)
- 484 [22] Peterson MA, Cacciamani L, Mojica AJ, Sanguinetti JL. Meaning can be accessed for the  
485 ground side of a figure. *Gestalt Theory.* 2012;34:297-314.
- 486 [23] Peer E, Vosgerau J, Acquisti A. Reputation as a sufficient condition for data quality on  
487 Amazon Mechanical Turk. *Behav Res Methods.* 2014;46:1023-31. doi: 10.3758/s13428-013-  
488 0434-y
- 489 [24] Kogo N, Strecha C, Van Gool L, Wagemans J. Surface construction by a 2-D  
490 differentiation–integration process: A neurocomputational model for perceived border  
491 ownership, depth, and lightness in Kanizsa figures. *Psychol Rev.* 2010;117:406-39. doi:  
492 [10.1037/a0019076](https://doi.org/10.1037/a0019076)
- 493 [25] Vecera SP, O'reilly RC. Figure-ground organization and object recognition processes: an  
494 interactive account. *J Exp Psychol Hum Percept Perform.* 1998;24:441-62. doi: [10.1037/0096-  
495 1523.24.2.441](https://doi.org/10.1037/0096-1523.24.2.441)

- 496 [26] Perrett DI, Oram MW, Ashbridge E. Evidence accumulation in cell populations responsive  
497 to faces: an account of generalisation of recognition without mental transformations. *Cognition*.  
498 1998;67:111-45. doi: [10.1016/S0010-0277\(98\)00015-8](https://doi.org/10.1016/S0010-0277(98)00015-8)

499 Appendix A. Image statistics for bipartite images. Statistics are shown for *Intact* and *Part-*  
 500 *Rearranged* displays. The statistics are the same for both *Upright* and *Inverted* orientations.  
 501 Category denotes whether the source object is Natural (N) or Artificial (A); \* = ambiguous.  
 502 “Area (px)” is the total number of pixels in the display. “% Area Crit Side” is the percentage of  
 503 pixels on the critical side of the border. The percentage of pixels on the complementary side of  
 504 the border is (1 – “% Area Crit Side.” “Border Length” is the length of the central border in  
 505 pixels calculated using the bwperim function in MATLAB (2016b; MathWorks, Natick, MA).

| Source Object | Category | Intact    |                  |                    | Part-Rearranged |                  |                    |
|---------------|----------|-----------|------------------|--------------------|-----------------|------------------|--------------------|
|               |          | Area (px) | % Area Crit Side | Border Length (px) | Area (px)       | % Area Crit Side | Border Length (px) |
| anchor        | A        | 70315     | 49.82            | 744                | 69629           | 50.10            | 584                |
| apple         | N        | 66542     | 49.97            | 451                | 69629           | 49.90            | 451                |
| axe           | A        | 49392     | 49.92            | 618                | 49392           | 49.79            | 604                |
| bear          | N        | 48363     | 50.04            | 630                | 50421           | 50.00            | 665                |
| bell          | A        | 59339     | 50.19            | 536                | 59339           | 50.10            | 485                |
| boot          | A        | 78890     | 50.04            | 565                | 78890           | 49.87            | 577                |
| bottle        | A        | 70315     | 49.66            | 368                | 70315           | 50.18            | 374                |
| butterfly     | N        | 118678    | 49.94            | 1043               | 118678          | 50.06            | 1013               |
| cow           | N        | 82320     | 49.95            | 623                | 80262           | 50.03            | 572                |
| dog           | N        | 79233     | 50.01            | 581                | 86436           | 49.90            | 589                |
| duck          | N        | 73402     | 49.92            | 535                | 73402           | 50.05            | 536                |
| eagle         | N        | 71687     | 50.06            | 454                | 71687           | 50.13            | 458                |
| elephant      | N        | 102900    | 49.93            | 809                | 102900          | 50.11            | 778                |
| face          | N        | 79233     | 50.02            | 415                | 79233           | 49.89            | 415                |
| faucet        | A        | 89523     | 50.06            | 728                | 89523           | 50.11            | 728                |
| fire hydrant  | A        | 81291     | 49.90            | 479                | 81291           | 50.13            | 450                |
| flower        | N        | 80262     | 49.94            | 945                | 80262           | 50.09            | 884                |
| foot          | N        | 62083     | 49.99            | 606                | 62083           | 49.91            | 603                |
| grapes        | N        | 68257     | 50.07            | 552                | 68257           | 50.14            | 540                |
| guitar        | A        | 57967     | 50.09            | 395                | 58310           | 50.02            | 384                |
| hands         | N        | 70658     | 50.04            | 794                | 70658           | 50.01            | 771                |
| house         | A        | 84035     | 50.00            | 470                | 84035           | 50.00            | 541                |
| jet           | A        | 45962     | 50.03            | 530                | 45619           | 50.08            | 533                |
| lamp          | A        | 58653     | 49.95            | 474                | 58653           | 47.86            | 458                |

506

507

508

509

(continued on next page)

| Source Object | Category | Intact    |                  |                    | Part-Rearranged |                  |                    |
|---------------|----------|-----------|------------------|--------------------|-----------------|------------------|--------------------|
|               |          | Area (px) | % Area Crit Side | Border Length (px) | Area (px)       | % Area Crit Side | Border Length (px) |
| lightbulb     | A        | 72030     | 50.06            | 365                | 72030           | 51.89            | 370                |
| maple leaf    | N        | 84721     | 50.07            | 692                | 84721           | 49.87            | 571                |
| mickey mouse  | A*       | 62426     | 50.00            | 613                | 62426           | 49.98            | 579                |
| owl           | N        | 60711     | 49.96            | 649                | 60711           | 50.15            | 631                |
| palm tree     | N        | 65170     | 49.86            | 739                | 65170           | 49.81            | 732                |
| pear          | N        | 56252     | 50.05            | 363                | 56252           | 49.78            | 364                |
| pig           | N        | 73059     | 50.00            | 583                | 72716           | 49.91            | 585                |
| pineapple     | N        | 79576     | 50.08            | 546                | 79576           | 49.90            | 543                |
| rabbit        | N        | 47334     | 50.16            | 507                | 47334           | 50.02            | 503                |
| rhino         | N        | 120050    | 50.02            | 846                | 120050          | 49.94            | 848                |
| seahorse      | N        | 106673    | 49.96            | 612                | 106673          | 49.93            | 615                |
| snowman       | A*       | 54537     | 49.94            | 441                | 54537           | 49.97            | 436                |
| spray bottle  | A        | 40474     | 50.08            | 486                | 40474           | 49.94            | 486                |
| teapot        | A        | 61397     | 50.02            | 524                | 61397           | 50.26            | 508                |
| toilet        | A        | 91924     | 50.06            | 633                | 95697           | 49.98            | 622                |
| train         | A        | 85750     | 49.93            | 612                | 85750           | 49.88            | 619                |
| tree          | N        | 83349     | 49.90            | 546                | 83006           | 50.02            | 440                |
| trumpet       | A        | 39445     | 49.99            | 548                | 39445           | 49.96            | 550                |
| turtle        | N        | 74088     | 49.99            | 799                | 74088           | 50.13            | 800                |
| umbrella      | A        | 92953     | 50.03            | 651                | 99813           | 50.06            | 652                |
| watering can  | A        | 105987    | 49.92            | 698                | 105987          | 50.04            | 700                |
| wine glass    | A        | 50764     | 50.08            | 414                | 50764           | 50.24            | 482                |
| woman         | N        | 38073     | 50.06            | 415                | 38416           | 49.88            | 393                |
| wrench        | A        | 76489     | 49.97            | 490                | 76489           | 49.84            | 488                |
| Means         |          | 72344.4   | 49.99            | 585.8              | 72758.9         | 50.00            | 573.1              |

A)

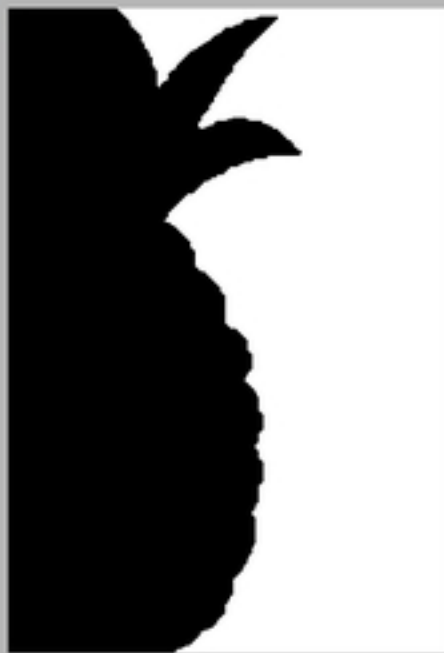

B)

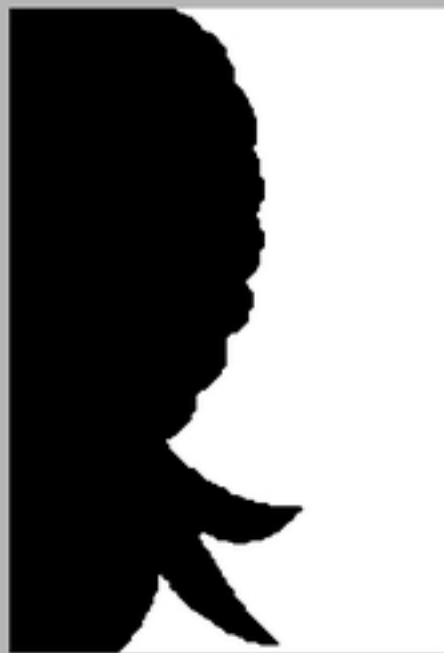

C)

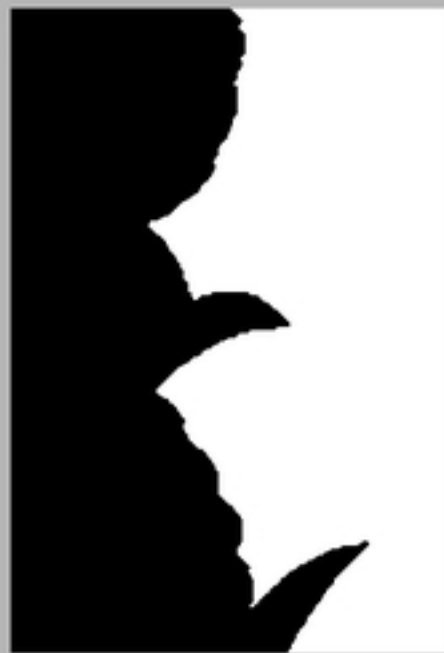

D)

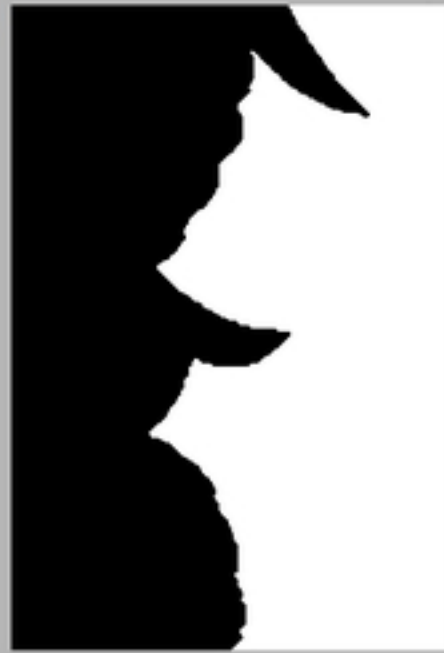

Figure1

## Identify Objects on Both Halves

Type the names of up to three familiar objects resembled by the left half of the image and then do the same for the right half. Type your responses in the three response boxes provided below each side. If you cannot identify any objects in a particular half, type the letter 'x' in the first (top) response box for that half of the image.

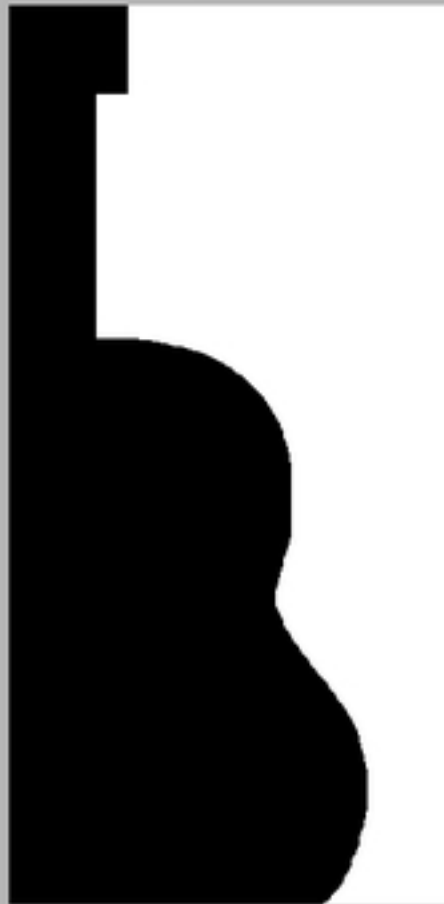

**Left Half of the Image**

**Right Half of the Image**

[Next Trial](#)
